# Supplementary material for: Swimming Performance and Oxygen Consumption as Non-lethal Indicators of Production Traits in Atlantic Salmon and Gilthead Seabream
Source: Front Physiol. 2020 Jul 7;11:759. doi: 10.3389/fphys.2020.00759 (PMC7358457; doi:10.3389/fphys.2020.00759)
Supplement: Supplementary file 1 [file Table_1.XLSX]

## Sheet: suppl mat 1 AS
Supplementary information Table S1: Pairwise correlations between predictors and other parameters for Atlantic salmon.
		FCR1	d_Dm_intake_p1	RFI1	ADG1	ADL1	FCR2	d_Dm_intake_p2	RFI2	ADG2	ADL2	eaten.t108	conc.Ash	Cal (mJ/kg)	conc.Fat	conc.Moist	conc.Prot	FATi index	Wliver index	Woes index	Loes index	Wstom index	Lstom index	Wpc index	Lpc index	Wmedint index	Lmedint index	Wfillet index	Lfillet index	Wcarcass index
BWstart1	Correlation Coefficient	-0.217411	,707**	0.0107099	,700**	-,470**	-,343*	,663**	-0.000917994	,665**	-0.199035	,716**	-0.230911	-0.0466946	-0.0739211	0.0438568	0.123929	-0.212516	0.0927173	-0.300337	-0.153306	-0.256885	-0.238327	0.117656	0.229456	0.00336598	-0.233473	-0.00657895	0.164519	0.0775705
	Sig. (2-tailed)	0.21678	2.95437e-06	0.952064	4.13606e-06	0.0058235	0.0468174	1.92551e-05	0.995889	1.78952e-05	0.259112	1.91009e-06	0.188878	0.796378	0.677793	0.808517	0.484993	0.227563	0.601995	0.0843756	0.394343	0.142485	0.181669	0.507527	0.19896	0.984927	0.190994	0.970543	0.360242	0.662801
	N	34	34	34	34	33	34	34	34	34	34	34	34	33	34	33	34	34	34	34	33	34	33	34	33	34	33	34	33	34
BWstart2	Correlation Coefficient	-0.267095	,867**	0.0701352	,860**	-,574**	-0.318894	,771**	-0.101765	,757**	-0.292049	,754**	-0.310232	0.0431186	0.0331678	-0.0239031	0.1146	-0.111544	0.149591	-0.261441	-0.154592	-0.261594	-0.258711	0.157384	0.180663	-0.0643288	-0.238656	-0.0253648	0.191192	0.11842
	Sig. (2-tailed)	0.126747	3.37762e-11	0.693474	7.065e-11	0.00047168	0.066029	9.57611e-08	0.566861	2.19142e-07	0.0937401	2.68208e-07	0.0741588	0.811682	0.852275	0.894955	0.518691	0.529975	0.398446	0.135295	0.39034	0.135058	0.146012	0.37404	0.314355	0.717769	0.181048	0.886771	0.286497	0.504755
	N	34	34	34	34	33	34	34	34	34	34	34	34	33	34	33	34	34	34	34	33	34	33	34	33	34	33	34	33	34
Ucrit (m/s)	Correlation Coefficient	0.0762764	0.262325	0.066952	0.250096	0.122857	-0.300214	0.142475	0.334149	0.172424	-0.0796941	0.114032	-0.204327	-0.13058	-0.156498	0.190635	0.0981351	-0.325283	-0.0603791	-0.215683	-0.185572	-0.309233	-0.245423	0.0684806	,407*	0.297768	0.0944579	-0.227606	0.119535	0.150413
	Sig. (2-tailed)	0.668103	0.133931	0.706758	0.153714	0.495787	0.0845089	0.42151	0.0534271	0.3295	0.654135	0.520778	0.246402	0.468874	0.376768	0.287929	0.580843	0.0604939	0.734453	0.220545	0.301163	0.0751442	0.168621	0.700368	0.0188713	0.0871973	0.601066	0.195462	0.507598	0.395831
	N	34	34	34	34	33	34	34	34	34	34	34	34	33	34	33	34	34	34	34	33	34	33	34	33	34	33	34	33	34
RUcrit	Correlation Coefficient	0.144996	0.0437008	0.0490451	0.0246008	0.290897	-0.240947	-0.029032	,361*	0.0025974	-0.0169712	-0.0899924	-0.115373	-0.146056	-0.152835	0.198563	0.0245989	-,362*	-0.0612681	-0.115966	-0.142714	-0.216807	-0.0862299	0.0634072	0.29746	0.259282	0.253342	-0.268449	0.0130348	0.152941
	Sig. (2-tailed)	0.413255	0.806144	0.782972	0.89016	0.100511	0.169838	0.870529	0.0359228	0.988368	0.924106	0.612757	0.515856	0.417343	0.388178	0.26797	0.890169	0.0352542	0.730686	0.513685	0.428194	0.218092	0.63326	0.721651	0.0927266	0.138668	0.154866	0.12476	0.942606	0.387845
	N	34	34	34	34	33	34	34	34	34	34	34	34	33	34	33	34	34	34	34	33	34	33	34	33	34	33	34	33	34

## Sheet: suppl mat 2 GS
Supplementary information Table S2: Pairwise correlations between predictors and other parameters for Gilthead seabream.
		FCR1	d_Dm_intake_p1	RFI1	ADG1	ADL1	FCR2	d_Dm_intake_p2	RFI2	ADG2	ADL2	eaten.t105	conc.Ash	Cal (mJ/kg)	conc.Fat	conc.Moist	conc.Prot	FATiindex	Wliver index	Wfillet index	Wcarcass index	Bwdegutted index	Wvisceraindex	Woes-stom-pcindex	Wintindex	Lintindex	Hct
BWstart1	Correlation Coefficient	-,382*	,673**	-0.0297485	,756**	-,561**	-,344*	,605**	0.0823932	,776**	-,647**	,557**	-,496**	,490**	,492**	-,432*	-0.0411332	0.149813	0.144571	,559**	-,365*	0.138522	0.353665	-,373*	-0.195181	-0.0842827	0.201879
	Sig. (2-tailed)	0.0280805	1.81127e-05	0.869464	3.59799e-07	0.000688148	0.0496531	0.000193714	0.648505	1.1471e-07	4.68391e-05	0.00113201	0.00533594	0.0070086	0.00493079	0.0193097	0.826104	0.421164	0.437779	0.00108727	0.0432673	0.457386	0.0509615	0.0385037	0.292696	0.652144	0.276117
	N	33	33	33	33	33	33	33	33	33	33	31	30	29	31	29	31	31	31	31	31	31	31	31	31	31	31
BWstart2	Correlation Coefficient	-,509**	,690**	-0.0464611	,875**	-,460**	-,382*	,661**	0.109468	,844**	-,590**	,609**	-,529**	,568**	,574**	-,523**	-0.134893	0.213126	0.186914	,580**	-,404*	0.0887186	,385*	-0.354507	-0.213328	-0.0455691	0.167946
	Sig. (2-tailed)	0.00251095	8.80094e-06	0.797375	2.87354e-11	0.00709319	0.0284547	2.77194e-05	0.544233	7.04383e-10	0.00030284	0.000279357	0.00262862	0.00129906	0.000740282	0.00358132	0.469371	0.249667	0.314014	0.000624708	0.0243236	0.63507	0.0326964	0.0503734	0.249208	0.807682	0.366475
	N	33	33	33	33	33	33	33	33	33	33	31	30	29	31	29	31	31	31	31	31	31	31	31	31	31	31
Ucrit (m/s)	Correlation Coefficient	-0.116073	,553**	0.112059	,494**	-,360*	-0.169761	,370*	0.143837	,478**	-,499**	0.325295	-0.19185	0.120577	0.0606458	-0.0664612	0.0452023	0.159419	0.234285	0.29886	-0.218747	0.152558	0.193119	-,491**	-0.0746645	-0.155585	0.253184
	Sig. (2-tailed)	0.520057	0.000853842	0.534686	0.00347819	0.0394644	0.344925	0.0339895	0.424531	0.00493502	0.00314245	0.074154	0.309807	0.533255	0.745874	0.731944	0.809201	0.39165	0.20459	0.102433	0.2371	0.412608	0.297925	0.00506542	0.689754	0.403285	0.169364
	N	33	33	33	33	33	33	33	33	33	33	31	30	29	31	29	31	31	31	31	31	31	31	31	31	31	31
RUcrit	Correlation Coefficient	0.126191	-0.0436236	0.0897543	-0.0989553	0.287125	0.264416	-0.0925957	0.0222297	-0.231322	0.175684	-0.0649324	0.253032	-0.170464	-0.10608	0.155457	0.287961	0.183101	-0.106876	-,383*	0.317403	-0.0252067	-0.20972	-0.02289	-,467**	-0.181488	-0.007575
	Sig. (2-tailed)	0.484074	0.809516	0.619384	0.583772	0.105205	0.137016	0.608291	0.902273	0.195231	0.328101	0.728562	0.177305	0.376645	0.570058	0.420675	0.116206	0.324163	0.567151	0.0336798	0.0818744	0.892929	0.257494	0.902721	0.00814059	0.328517	0.96774
	N	33	33	33	33	33	33	33	33	33	33	31	30	29	31	29	31	31	31	31	31	31	31	31	31	31	31
